# Supplementary material for: The Overlooked Microbiome—Considering Archaea and Eukaryotes Using Multiplex Nanopore-16S-/18S-rDNA-Sequencing: A Technical Report Focusing on Nasopharyngeal Microbiomes
Source: MDPI journal article supplement (doi:10.3390/ijms24021426), 2023-01-11
Supplement: s1 [file s1]

## Supplementary Material

**Supplementary Table S1. Primer selection for validation of selected taxa using TYMS or rDNA amplicons.**

| No. | Primer Name                    | Sequence                    |
|-----|--------------------------------|-----------------------------|
| 1   | TYMS- <i>Malassezia_fw</i>     | 5'-cccgtgccatatcctctgtc -3' |
| 2   | TYMS- <i>Malassezia_rv</i>     | 5'-agttccacatcttcagggcg -3' |
| 3   | TYMS- <i>Staphylococcus_fw</i> | 5'-tcttgctgggaacgatgtcc -3' |
| 4   | TYMS- <i>Staphylococcus_rv</i> | 5'-tgggcatcaattgcgtttcg -3' |
| 5   | TYMS- <i>Corynebact_fw</i>     | 5'-tactgcttctacgcactgtct-3' |
| 6   | TYMS- <i>Corynebact_rv</i>     | 5'-cgtcgacggagatatcgaaa -3' |
| 7   | S-D-Arch-0344-fw               | 5'-acgggggygcagcaggcgcca-3' |
| 8   | S-D-Arch-1041-rev              | 5'-ggccatgcaccwcctctc-3'    |
| 9   | <i>Methanobrevi_nest_fw</i>    | 5'-gaattgctggagatactatta-3' |
| 10  | <i>Methanobrevi_nest_rv</i>    | 5'-cttccttcggcactgagac-3'   |
| 11  | <i>Halalkali_nest_fw</i>       | 5'-acgtccggcggaaccagt-3'    |
| 12  | <i>Halalkali_nest_rv</i>       | 5'-cttcctacggcacagcact-3'   |
| 13  | <i>Natrarch_nest_fw</i>        | 5'-gcgtccggtggaaactgcg-3'   |
| 14  | <i>Natrarch_nest_rv</i>        | 5'-cttcctacggcacatcaca-3'   |

**Supplementary Table S2. Primer selection for archaea and eukaryotes.** Stated names refer to the names used in the original papers, stated primer names refer to the original manufacturer identification.

| No. | Name  | Primer name       | Sequence                                      |
|-----|-------|-------------------|-----------------------------------------------|
| 1   | 344F  | S-D-Arch-0344-fw  | 5'-acgggggygcagcaggcgcca-3'                   |
| 2   | 1041R | S-D-Arch-1041-rev | 5'-ggccatgcaccwcctctc-3'                      |
| 3   | 519F  | Arch-519F-Tag     | 5'-tttctgttggtgctgatattgccagcmgcccggtaa-3'    |
| 4   | 786R  | Arch-786R-Tag     | 5'-acttgctgtcgtctatctcggactacvsgggtatcta-3'   |
| 5   | 563F  | Euk-563F-Tag      | 5'-tttctgttggtgctgatattgcgccagcavcygcggtaa-3' |
| 6   | 1132R | Euk-1132R-Tag     | 5'-acttgctgtcgtctatcttcccgtcaattthcttaart-3'  |

**Supplementary Table S3.** Modified DNA purification protocol for nasopharyngeal swab specimen according to biological fluids protocol and DNA Purification from Tissues protocol in QIAamp® DNA Mini and Blood Mini Handbook 05/2016 by QIAGEN (also adapted from [40]).

- Centrifugation of bacteria pellet: 10 min at 5000× g (7500 rpm)
- Resuspension of the pellet in 180 µL Buffer ATL
- Adding 20 µL proteinase K, vortexing, incubation at 56 °C until lysis is completed. Occasionally vortexing.
- Briefly centrifugation of the sample.
- Adding 200 µL Buffer AL, pulse-vortex afterwards (15 s), incubation at 70 °C (10 min). Short centrifugation of the sample.
- Adding 200 µL ethanol (96–100%), mixing by pulse-vortexing (15 s). Afterwards, short centrifugation of the sample.
- Transferring mixture (including precipitate) to the QIAamp Mini spin columns. CAVE: without wetting the rim. Centrifugation for 1 min at 6000× g (8000 rpm). Replace the QIAamp Mini spin columns into a clean 2 mL collection tube, discard the tube with the filtrate.
- Adding 500 µL Buffer AW1, CAVE: without wetting the rim. Centrifuge for 1 min at 6000× g (8000 rpm). Replace the QIAamp Mini spin columns into a clean 2 mL collection tube, discard the tube with the filtrate.
- Adding 500 µL Buffer AW2 to the QIAamp Mini spin column without wetting the rim. Close the column and centrifuge for 3 min at full speed (20,000× g)
- Replace QIAamp Mini spin columns into a new 2 mL collection tube. Discard the tube with the filtrate and centrifuge for 1 min at full speed (20,000× g)
- Place QIAamp Mini spin columns to a new 1.5 mL microcentrifuge tube. Discard the tube with the filtrate and add 100 µL Buffer AE/distilled water. Incubate at room temperature for 5 min and centrifuge for 1 min at 6000× g (8000 rpm).
- Repeat step k): Repeat the flowthrough of the previous step to the same Mini Spin column, incubate at room temperature for 5 min, and centrifuge for 1 min, at 6000× g (8000 rpm)
- Instead of 200 µL, as provided in QIAamp® Handbook, we used 100 µL in step k and incubated for 5 min, instead of 1 min, because extended incubation generally increased DNA yield, in our opinion. Afterwards, in step l, we used the same 100 µL and transferred back to the columns and incubated for further 5 min.
